# Supplementary material for: The risk of Plasmodium vivax parasitaemia after P. falciparum malaria: An individual patient data meta-analysis from the WorldWide Antimalarial Resistance Network
Source: PLOS journal article supplement (doi:10.1371/journal.pmed.1003393), 2020-11-19
Supplement: S13 (10.1371/journal.pmed.1003393.s013) [file journal.pmed.1003393.s013]

**S5 Table. Comparison of baseline characteristics from included and targeted studies**

| Characteristic            | Included studies<br>(n=42) | Targeted studies*<br>(n=25) |
|---------------------------|----------------------------|-----------------------------|
| Region                    |                            |                             |
| Asia-Pacific, studies (%) | 39 (92.9)                  | 18 (72.0)                   |
| Africa, studies (%)       | 1 (2.4)                    | 6 (24.0)                    |
| The Americas, studies (%) | 2 (4.8)                    | 1 (4.0)                     |
| Year of enrolment†‡       |                            |                             |
| Pre-2009, studies (%)     | 31 (75.6)                  | 15 (60.0)                   |
| 2009-2017, studies (%)    | 10 (24.4)                  | 10 (40.0)                   |
| Age (years), median (IQR) | 17.0 (9.0, 29.0)           | 23.4 (17.1, 24.7)§          |
| Male, % of patients       | 63.3                       | 68.0¶                       |

\*Age and male percentage of targeted studies frequency weighted according to number of patients treated with artemisinin-based combination therapy; † Year of enrolment defined as the year study enrolment completed; ‡ Year of enrolment not available from one included study; § Mean age not available from nine studies; ¶ Percentage based on frequency weighted median, percentage not available from five studies
