# Supplementary material for: The risk of Plasmodium vivax parasitaemia after P. falciparum malaria: An individual patient data meta-analysis from the WorldWide Antimalarial Resistance Network
Source: PLOS journal article supplement (doi:10.1371/journal.pmed.1003393), 2020-11-19
Supplement: S23 (10.1371/journal.pmed.1003393.s023) [file journal.pmed.1003393.s023]

**S15 Table. Relationship between patient characteristics and study site malaria prevalence and rate of *P. vivax* parasitaemia between day 7 and 42 in patients treated with dihydroartemisinin-piperaquine**

|                                                                            | <b>Total N (n)</b> | <b>Adjusted HR (95% CI)</b> | <b>p value</b> |
|----------------------------------------------------------------------------|--------------------|-----------------------------|----------------|
| Age, years                                                                 |                    |                             |                |
| <5                                                                         | 358 (58)           | 3.66 (2.09 – 6.40)          | <0.001         |
| 5 to <15                                                                   | 783 (37)           | 1.01 (0.61 – 1.68)          | 0.967          |
| ≥15                                                                        | 1446 (38)          | Reference                   | -              |
| Gender                                                                     |                    |                             |                |
| Male                                                                       | 1634 (75)          | 1.02 (0.72 - 1.44)          | 0.913          |
| Female                                                                     | 953 (58)           | Reference                   | -              |
| Mixed infection at baseline                                                |                    |                             |                |
| Yes                                                                        | 155 (21)           | 3.21 (1.88 – 5.47)          | <0.001         |
| No                                                                         | 2432 (112)         | Reference                   | -              |
| Parasitaemia, >100,000 parasites/μL                                        |                    |                             |                |
| Yes                                                                        | 182 (13)           | 1.40 (0.72 – 2.74)          | 0.320          |
| No                                                                         | 2405 (120)         | Reference                   | -              |
| Baseline haemoglobin (per 1 g/dL increase)                                 | 2587 (133)         | 0.86 (0.79 – 0.94)          | <0.001         |
| Relapse periodicity                                                        |                    |                             |                |
| Short                                                                      | 2325 (132)         | 6.84 (0.50 – 92.69)         | 0.148          |
| Long                                                                       | 262 (1)            | Reference                   | -              |
| <i>P. falciparum</i> incidence (per 1 case increase per 1000 person years) | 2587 (133)         | 1.00 (0.98 - 1.03)          | 0.724          |
| <i>P. vivax</i> incidence (per 1 case increase per 1000 person years)      | 2587 (133)         | 1.00 (0.98 - 1.02)          | 0.779          |

Only includes studies with a minimum follow up of 42 days. There was no interaction between *P. falciparum* and *P. vivax* incidence, and they remained non-significant when only one of these variables was included in the analysis; CI – confidence interval; HR – hazard ratio; n – number of patients with *P. vivax* recurrence; N – total number of patients
